# Supplementary material
Source: PubMed Central journal article supplement (PMC6580669)

**Disconnect between fibrotic response and right ventricular dysfunction**

Slaven Crnkovic, PhD; Bakytbek Egemnazarov, MD, PhD; Rachel Damico, MD, PhD;  
Leigh M Marsh, PhD; Bence M Nagy, PhD; Philipp Douschan, MD; Kwame Atsina, MD;  
Todd M Kolb, MD, PhD; Stephen C Mathai, MD; Jody E Hooper, MD; Bahil Ghanim, MD, PhD;  
Walter Klepetko, MD; Friedrich Fruhwald, MD, PhD; Dirk Lassner, MD;  
Andrea Olschewski, MD; Horst Olschewski, MD; Paul M Hassoun, MD; and  
Grazyna Kwapiszewska, PhD

ONLINE DATA SUPPLEMENT

## Online Data Supplement

### Expanded methods

#### *Human material*

RV myocardial biopsies from patients with dilated cardiomyopathy were collected at the Medical University of Graz and underwent certified evaluation at the Institute for Cardiac Diagnostic and Therapy (Berlin, Germany) after written informed consent. Samples with no signs of viral or autoimmune disease were provided for research purposes.

#### *Animal studies*

Chronic hypoxia-induced pulmonary hypertension in mice was done as reported previously<sup>492</sup> Crnkovic 2016;}. Male CD1 mice at 10 weeks of age (Harlan Laboratories, Italy) were exposed for 5 weeks to normobaric hypoxia (10% oxygen) or normoxia. Chambers (Biospherix, USA) were supplemented with CO<sub>2</sub> absorber (GE Healthcare, Austria) and animals had ad libitum access to food and water.

#### *Hydroxyproline assay*

RV tissue samples minced in the 1 M NaCl buffer containing 0.05 M Tris, 1mM PMSF, 1 mM NEM, 5 mM EDTA, pH 7.5 were centrifuged at 13000 g for 15 minutes at 4°C to isolate non-crosslinked collagen. The pellet was resuspended in 0.5 M acetic acid and digested with 5 mg/mL pepsin for 24 h at 4°C followed by centrifugation at 13000 g for 15 minutes at 4°C to isolate crosslinked collagen. The obtained material was subjected to acid hydrolysis and hydroxyproline measurement using QuickZyme Hydroxyproline assay (QuickZyme Biosciences, USA). Data were normalized to the protein concentration of the tissue samples.

#### *Capillary density*

RV capillary density was determined with semiautomated image analysis (Visiomorph DP software; Visiopharm, Horshol, Denmark) on formalin-fixed, paraffin-embedded heart tissue stained against endothelial cell marker thrombomodulin as described previously{{492 Crnkovic 2016;}}.

**Table E1. Clinical characteristics of patients used for right ventricle histologic assessment.**

| patient | sex | age | height (cm) | weight (kg) | diagnosis                                            | mPAP (mmHg) |
|---------|-----|-----|-------------|-------------|------------------------------------------------------|-------------|
| 1       | F   | 50  | n.a.        | n.a.        | systemic sclerosis – pulmonary arterial hypertension | 55          |
| 2       | F   | 68  | n.a.        | n.a.        | idiopathic pulmonary arterial hypertension           | 65          |
| 3       | F   | 67  | n.a.        | n.a.        | systemic sclerosis – pulmonary arterial hypertension | 48          |
| 4       | M   | 43  | 175         | 89          | dilative cardiomyopathy                              | 28          |
| 5       | M   | 39  | 178         | 83          | dilative cardiomyopathy                              | 33          |
| 6       | M   | 53  | 181         | 88          | dilative cardiomyopathy                              | 31          |
| 7       | M   | 45  | 178         | 82          | dilative cardiomyopathy                              | 41          |
| 8       | M   | 58  | 180         | 90          | dilative cardiomyopathy                              | 46          |
| 9       | F   | 59  | 163         | 55          | dilative cardiomyopathy                              | 41          |
| 10      | M   | 56  | 175         | 83          | dilative cardiomyopathy                              | 11          |
| 11      | M   | 45  | 180         | 100         | dilative cardiomyopathy                              | 9           |
| 12      | M   | 53  | 171         | 89          | dilative cardiomyopathy                              | 19          |
| 13      | M   | 26  | 183         | 104         | dilative cardiomyopathy                              | 25          |

mPAP – mean pulmonary artery pressure; na – not available.

**Table E2. Clinical characteristics of patients used for serum ELISA measurements of galectin-3.**

|                    | sex      | age                     | mPAP*<br>(mmHg) | PVR <sup>†</sup><br>(dyn<br>s/cm <sup>5</sup> ) | PAWP <sup>‡</sup><br>(mmHg<br>) | CO <sup>§</sup><br>(L/mi<br>n) | CI <sup>§</sup><br>(L/min/m <sup>2</sup> ) | NT-<br>proBNP<br>(pg/mL) | 6MWD <sup>#</sup><br>(m) |
|--------------------|----------|-------------------------|-----------------|-------------------------------------------------|---------------------------------|--------------------------------|--------------------------------------------|--------------------------|--------------------------|
| LBI<br>IPAH        | 8/2      | 57.5<br>(47.6-<br>67.4) | 41 (33-<br>48)  | 485 (346-<br>623)                               | 7 (5-10)                        | 5.66<br>(4.90-<br>6.41)        | 3.03 (2.62-<br>3.44)                       | 544<br>(148-<br>941)     | 389<br>(317-<br>462)     |
| USA<br>IPAH        | 30/<br>8 | 53.4<br>(48.8-<br>58.1) | 49 (44-<br>54)  | 736 (600-<br>871)                               | 11 (10-<br>13)                  | 4.60<br>(4.12-<br>5.09)        | 2.47 (2.22-<br>2.71)                       | 1663<br>(540-<br>2787)   | 418<br>(380-<br>455)     |
| USA<br>SSc-<br>PAH | 37/<br>6 | 66.4<br>(62.4-<br>70.4) | 39 (34-<br>43)  | 592 (428-<br>756)                               | 10 (9-<br>12)                   | 4.90<br>(4.21-<br>5.58)        | 2.68 (2.36-<br>3.00)                       | 2374<br>(1129-<br>3619)  | 340<br>(307-<br>372)     |
| LBI<br>donor<br>s  | 10/<br>5 | 48.8<br>(38.5-<br>59.1) | n.a.            | n.a.                                            | n.a.                            | n.a.                           | n.a.                                       | n.a.                     | n.a.                     |
| USA<br>donor<br>s  | 10/<br>0 | 37.7<br>(30.5-<br>44.9) | n.a.            | n.a.                                            | n.a.                            | n.a.                           | n.a.                                       | n.a.                     | n.a.                     |

Data are presented as mean (95% confidence interval).

§CI – cardiac index; §CO – cardiac output; IPAH – idiopathic pulmonary arterial hypertension;  
\*mPAP – mean pulmonary artery pressure; ‡PAWP – pulmonary arterial wedge pressure; †PVR  
– pulmonary vascular resistance; #6MWD – six minute walk distance; n.a. – not available.

**Table E3. Correlation of clinical parameters with galectin-3 serum levels.**

|                 | <b>mPAP*</b><br>(mmHg) | <b>PVR<sup>†</sup></b> (dyn<br>s/cm <sup>5</sup> ) | <b>PAWP<sup>‡</sup></b><br>(mmHg) | <b>CO<sup>§</sup></b><br>(L/min) | <b>CI<sup>§</sup></b><br>(L/min/m <sup>2</sup> ) | <b>NT-<br/>proBNP</b><br>(pg/mL) | <b>6MWD<sup>#</sup></b><br>(m) |
|-----------------|------------------------|----------------------------------------------------|-----------------------------------|----------------------------------|--------------------------------------------------|----------------------------------|--------------------------------|
| n (all PAH)     | 77                     | 77                                                 | 77                                | 77                               | 68                                               | 62                               | 77                             |
| Spearman r      | 0.005683               | 0.1265                                             | -0.06996                          | -0.2294                          | -0.09672                                         | -0.02518                         | -<br>0.005681                  |
| P value         | 0.9609                 | 0.2728                                             | 0.5454                            | 0.0448                           | 0.4327                                           | 0.846                            | 0.9609                         |
| n (all IPAH)    | 43                     | 43                                                 | 43                                | 43                               | 38                                               | 33                               | 43                             |
| Spearman r      | -0.1371                | -0.1164                                            | -0.03788                          | 0.0614                           | 0.1679                                           | -0.04245                         | -0.1342                        |
| P value         | 0.3808                 | 0.4572                                             | 0.8094                            | 0.6957                           | 0.3136                                           | 0.8146                           | 0.3909                         |
| n (LBI IPAH)    | 10                     | 10                                                 | 10                                | 10                               | 10                                               | 10                               | 10                             |
| Spearman r      | -0.1515                | -0.3333                                            | 0.4322                            | 0.503                            | 0.2364                                           | -0.1152                          | -0.2606                        |
| P value         | 0.6821                 | 0.3487                                             | 0.2182                            | 0.144                            | 0.5135                                           | 0.7589                           | 0.4697                         |
| n (USA IPAH)    | 33                     | 33                                                 | 33                                | 33                               | 28                                               | 23                               | 33                             |
| Spearman r      | -0.05318               | 0.04579                                            | 0.02117                           | -0.1712                          | 0.05003                                          | -0.02273                         | -0.2189                        |
| P value         | 0.7688                 | 0.8002                                             | 0.9069                            | 0.3408                           | 0.8004                                           | 0.918                            | 0.2211                         |
| n (USA SSc-PAH) | 34                     | 34                                                 | 34                                | 34                               | 30                                               | 29                               | 34                             |
| Spearman r      | 0.128                  | 0.3367                                             | -0.09995                          | -0.5324                          | -0.399                                           | 0.03941                          | 0.2597                         |
| P value         | 0.4708                 | 0.0515                                             | 0.5738                            | 0.0012                           | 0.0289                                           | 0.8391                           | 0.138                          |

<sup>§</sup>CI – cardiac index; <sup>§</sup>CO – cardiac output; (I)PAH – (idiopathic) pulmonary arterial hypertension; \*mPAP – mean pulmonary artery pressure; <sup>‡</sup>PAWP – pulmonary arterial wedge pressure; <sup>†</sup>PVR – pulmonary vascular resistance; SSc-PAH – connective tissue disease associated PAH; <sup>#</sup>6MWD – six minute walk distance.

**Table E4. Antibodies used in the study.**

| <b>antibody</b>                                        | <b>producer</b>         | <b>catalog number</b>         | <b>dilution</b>         |
|--------------------------------------------------------|-------------------------|-------------------------------|-------------------------|
| galectin-3                                             | R&D Systems             | AF1197                        | IHC/IF 1:200; WB 1:600; |
|                                                        | Millipore               | MABT51                        | IHC/IF 1:200            |
| vimentin                                               | Cell Signaling          | 3932                          | IHC/IF 1:50             |
|                                                        |                         | 9856 (IF)                     | IHC/IF 1:50             |
| platelet derived growth factor receptor alpha          | Cell Signaling          | 3174                          | IHC/IF 1:100; WB 1:1000 |
|                                                        | R&D Systems             | AF1062                        | IHC/IF 1:100            |
| alpha smooth muscle actin                              | Sigma                   | F3777                         | IHC/IF 1:100            |
|                                                        | Sigma                   | C6198                         | IHC/IF 1:100            |
|                                                        | Everest Biotech         | A305053                       | IHC/IF 1:100            |
| donkey anti-rabbit IgG Alexa Fluor 488/555 conjugate   | ThermoFisher Scientific | A-21206<br>A-31572            | IF 1:500                |
| donkey anti-goat IgG Alexa Fluor 488/555/647 conjugate |                         | A-11055<br>A-21432<br>A-21447 |                         |
| donkey anti-rat IgG Alexa Fluor 488/555 conjugate      |                         | A-21208                       |                         |
| GAPDH                                                  | Santa Cruz              | SC-25778                      | WB 1:1000               |

IHC/IF – immunohistochemistry/immunofluorescence; WB – Western blotting.

**Table E5. Sequences of primers used in the study.**

| <b>primer</b>    | <b>accession number</b> | <b>forward</b>                | <b>reverse</b>               |
|------------------|-------------------------|-------------------------------|------------------------------|
| human PBGD       | NM_000190.3             | TCGGAGCCATCTGCAAGCGG          | GCCGGGTGTTGAGGTTTCCCC        |
| human B2M        | NM_004048.2             | CCTGGAGGCTATCCAGCGTAC<br>TCC  | TGTCGGATGGATGAAACCCAG<br>ACA |
| human galectin-3 | NM_002306.3             | CAGCCAAGTGCCACCGGAGC          | GGCACAATCAGTGGCCCAGCA<br>G   |
| mouse PBGD       | NM_013551.2             | GCCAGAGAAAAGTGCCGTGG<br>G     | TCCGGAGGCGGGTGTGAGG          |
| mouse B2M        | NM_009735.3             | CGGCCTGTATGCTATCCAGAA<br>AACC | TGTGAGGCGGGTGGAACTGTG        |
| mouse galectin-3 | NM_010705.3             | GCACTACCCAGGAAAATGGCA<br>GACA | CCCCAGGCTGGTCCCCCAT          |
| mouse Serca2a2   | NM_009722.3             | GGTCAACGAGAGCACGGGGC          | GCCGGCAATTCGTTGGAGCC         |



**Table E6. Non-invasive and invasive right ventricle functional parameters.**

| parameter                    | WT PAB (n=7) | GAL3 KO PAB (n=7) | p value |
|------------------------------|--------------|-------------------|---------|
| HR* (bpm)                    | 378 ± 22     | 369 ± 28          | 0.567   |
| gradient velocity (m/s)      | 2.59 ± 0.37  | 2.53 ± 0.62       | 0.876   |
| TAPSE <sup>†</sup> (mm)      | 0.75 ± 0.15  | 0.62 ± 0.11       | 0.104   |
| S <sup>‡</sup> (mm/s)        | 20.3 ± 4.3   | 19.0 ± 3.6        | 0.329   |
| e' <sup>§</sup> (mm/s)       | 16.2 ± 1.3   | 15.7 ± 2.6        | 0.931   |
| a' <sup>  </sup> (mm/s)      | 27.9 ± 1.6   | 24.4 ± 2.8        | 0.064   |
| cardiac output (mL/min)      | 13.4 ± 2.9   | 11.6 ± 3.2        | 0.534   |
| HR* (bpm)                    | 482 ± 18     | 483 ± 34          | 0.932   |
| contractility index (1/s)    | 159 ± 30     | 181 ± 31          | 0.200   |
| tau (ms)                     | 53 ± 19      | 43 ± 16           | 0.249   |
| pressure time index (mmHg s) | 2.43 ± 0.51  | 2.12 ± 0.46       | 0.240   |

<sup>||</sup>a' –late (atrial) peak of right ventricular relaxation velocity; <sup>§</sup>e' – early peak of right ventricular relaxation velocity; \*HR – heart rate (beats per minute); <sup>‡</sup>S' – velocity of the right ventricular contraction; <sup>†</sup>TAPSE – tricuspid annular plane systolic excursion; tau – time constant of monoexponential curve fitting model of RV diastolic pressure decay measured invasively. Data are given as mean ± SD; p value of Mann-Whitney test.

**Table E7. Non-invasive and invasive right ventricle functional parameters.**

| <b>parameter</b>             | <b>vehicle PAB (n=8)</b> | <b>NaCLac PAB (n=8)</b> | <b>p value</b> |
|------------------------------|--------------------------|-------------------------|----------------|
| HR* (bpm)                    | 413 ± 35                 | 422 ± 18                | 0.792          |
| gradient velocity (m/s)      | 2.72 ± 0.90              | 2.59 ± 0.19             | 0.165          |
| TAPSE† (mm)                  | 0.70 ± 0.17              | 0.73 ± 0.20             | 1.000          |
| S‡ (mm/s)                    | 22.1 ± 5.8               | 20.8 ± 4.4              | 0.282          |
| e'§ (mm/s)                   | 19.3 ± 4.0               | 16.8 ± 2.8              | 0.137          |
| a'¶ (mm/s)                   | 32.8 ± 7.8               | 29.2 ± 9.5              | 0.282          |
| cardiac output (mL/min)      | 14.0 ± 2.9               | 14.3 ± 2.1              | 0.798          |
| HR* (bpm)                    | 451 ± 57                 | 416 ± 51                | 0.959          |
| contractility index (1/s)    | 164 ± 33                 | 145 ± 27                | 0.235          |
| tau (ms)                     | 39 ± 14                  | 37 ± 9                  | 0.879          |
| pressure time index (mmHg s) | 2.61 ± 0.54              | 2.64 ± 0.59             | 0.879          |

¶a' –late (atrial) peak of right ventricular relaxation velocity; §e' – early peak of right ventricular relaxation velocity; \*HR – heart rate (beats per minute); ‡S' – velocity of the right ventricular contraction; †TAPSE – tricuspid annular plane systolic excursion; tau – time constant of monoexponential curve fitting model of RV diastolic pressure decay measured invasively. Data are given as mean ± SD; p value of Mann-Whitney test.

**Table E8. Non-invasive and invasive right ventricle functional parameters.**

| parameter                    | chow PAB (n=6) | pirfenidone PAB (n=8) | p value |
|------------------------------|----------------|-----------------------|---------|
| HR* (bpm)                    | 427 ± 26       | 446 ± 57              | 0.662   |
| gradient velocity (m/s)      | 2.85 ± 0.20    | 2.93 ± 0.14           | 0.534   |
| TAPSE <sup>†</sup> (mm)      | 0.59 ± 0.15    | 0.63 ± 0.16           | 0.445   |
| S <sup>‡</sup> (mm/s)        | 17.1 ± 4.0     | 17.6 ± 2.8            | 1.000   |
| e' <sup>§</sup> (mm/s)       | 14.9 ± 4.4     | 15.1 ± 3.4            | 0.841   |
| a' <sup>  </sup> (mm/s)      | 28.7 ± 7.2     | 28.2 ± 4.0            | 0.841   |
| cardiac output (mL/min)      | 12.8 ± 2.0     | 12.3 ± 2.4            | 0.755   |
| HR* (bpm)                    | 484 ± 60       | 506 ± 40              | 0.423   |
| contractility index (1/s)    | 166 ± 55       | 158 ± 43              | 0.762   |
| tau (ms)                     | 41 ± 39        | 28 ± 9                | 0.370   |
| pressure time index (mmHg s) | 2.14 ± 0.45    | 2.51 ± 0.74           | 0.367   |

<sup>||</sup>a' –late (atrial) peak of right ventricular relaxation velocity; <sup>§</sup>e' – early peak of right ventricular relaxation velocity; \*HR – heart rate (beats per minute); <sup>‡</sup>S' – velocity of the right ventricular contraction; <sup>†</sup>TAPSE – tricuspid annular plane systolic excursion; tau – time constant of monoexponential curve fitting model of RV diastolic pressure decay measured invasively. Data are given as mean ± SD; p value of Mann-Whitney test.

**Figure E1. Right ventricle (RV) fibrosis is characterized by expansion of PDGFR $\alpha$ - (platelet-derived growth factor receptor alpha)-expressing cells.** Representative immunofluorescence co-staining of the RV fibrotic regions against vimentin, PDGFR $\alpha$ , and  $\alpha$ SMA (alpha smooth muscle actin) with DAPI as nuclear counterstain. n=4 mice/group. Hearts were collected from mice 21 days after pulmonary artery banding (PAB) or sham operation. Scale bars 20  $\mu$ m. PDGFR $\alpha$  antibody specificity testing using blocking peptide. Scale bars: 200  $\mu$ m.

**Figure E2. Accumulation of galectin-3 in RV fibrotic regions.** (A) Representative immunohistochemical localization of galectin-3 expression in the RV from rats treated with monocrotaline (MCT, scale bar: 100  $\mu$ m) Sugen5416. Hearts were collected 28 days after MCT injection or 6 weeks after Sugen5416 application (including 3 weeks hypoxia exposure followed by 3 weeks normoxia). (B) Western blot detection of galectin-3 protein expression in the RV; n=6-8 rats/group. (C) Quantitative PCR determination of galectin-3 mRNA expression in the RV. Student's t-test with Welch's correction, \*p<0.05. (D) Quantitative PCR determination of galectin-3 mRNA expression in the RV from normoxia or chronic hypoxia-exposed (21 days) mice. (E) Representative immunofluorescent staining of RV fibrotic regions against galectin-3, vimentin, PDGFR $\alpha$  (platelet-derived growth factor receptor alpha), and  $\alpha$ SMA (alpha smooth muscle actin); n=4 mice/group (3 weeks PAB). Scale bar: 20  $\mu$ m. Immunofluorescent staining of PAB hearts against galectin-3 in wild type (WT) and galectin-3 knockout (GAL3 KO). Scale bar: 20  $\mu$ m.

**Figure E3. Morphological and molecular correlates of anti-fibrotic therapy.** (A) Quantification of right ventricular (RV) fibrosis by hydroxyproline assay. (B) Weight ration of RV to left ventricle and septum (Fulton index). (C,D) Assessment of RV capillary density. Hearts

were collected from vehicle and NaCLac-treated mice or (D) wild type (WT) and galectin-3 knockout (GAL3 KO) 21 days after pulmonary artery banding (PAB) or sham operation and stained against endothelial marker thrombomodulin. Two-way ANOVA with Bonferroni post-test (A,C,D). Mann-Whitney test (B), \*  $p < 0.05$ .

**Figure E4. Correlation of fibrosis with right ventricular diastolic parameters.** Fibrosis was assessed 21 days after pulmonary artery banding operation in controls or treated mice. Tau (time constant of monoexponential curve fitting model of RV diastolic pressure decay) and right ventricle end diastolic pressure (RVEDP) were measured invasively. (A,B) Wild type or galectin-3 knock-out mice. (C,D) Mice treated with vehicle or galectin-3 inhibitor (NaCLac). (E,F) Mice treated with chow diet or pirfenidone-containing diet. (G) Correlation of tau and RV fibrosis area on pooled samples. Non-parametric correlation (Spearman). Linear regression (full line) with 95% confidence intervals (dashed lines).

**Figure E5. Correlation of fibrosis with non-invasive right ventricular function parameters.** Fibrosis was assessed 21 days after pulmonary artery banding operation in controls or treated mice. Cardiac output (CO), tricuspid annular plane systolic excursion (TAPSE), and right ventricular relaxation velocity ( $e'$ ) were measured by echocardiography. (A-C) Wild type or galectin-3 knock-out mice. (D-F) Mice treated with vehicle or galectin-3 inhibitor (NaCLac). (G-I) Mice treated with chow diet or pirfenidone-containing diet. Non-parametric correlation (Spearman). Correlation of (J) CO and (K)  $e'$  with RV fibrosis area on pooled samples. Linear regression (full line) with 95% confidence intervals (dashed lines).

**Figure E6. Functional consequences of chronic pulmonary artery banding (PAB).** (A) Comparison of right ventricular (RV) fibrosis (Sirius red staining) between 3 weeks and 8 weeks PAB model. Two-way ANOVA with Bonferroni post-test, \* $p < 0.05$ . Serial echocardiographic assessment of (B) cardiac output (CO) and (C) tricuspid annular plane systolic excursion

(TAPSE) following 3 and 8 weeks PAB. Paired two-way ANOVA, \* $p < 0.05$ . Correlation of RV fibrosis with (D) RV end diastolic pressure, (E) cardiac output, and (F) tau. Effect of NaCLac and pirfenidone treatment in chronic PAB model (8 weeks) on (G) RV fibrosis level, (H) RV systolic pressure, and (I) RV end diastolic pressure. Two-way ANOVA with Bonferroni post-test,  $p < 0.05$ .

**Figure E7. Correlation of galectin-3 levels with right ventricular (RV) fibrosis, mean pulmonary artery pressure (mPAP), and N-terminal pro-B type natriuretic peptide (NT-proBNP) levels.** (A) Immunohistochemical staining of the RV against vimentin, platelet-derived growth factor receptor alpha (PDGFR $\alpha$ ), alpha smooth muscle actin ( $\alpha$ SMA), and galectin-3 on RV biopsy samples from patients with pulmonary hypertension (group 2 PH). Fibrotic regions were detected using Sirius red stain. Arrows depict positively stained regions/cells, arrowheads mark cardiac vessels. Scale bar: 500  $\mu$ m (50  $\mu$ m in magnified regions). (B) Fibrosis and galectin-3 scoring was performed on the RV biopsy samples from patients with or without pulmonary hypertension (group 2 PH).

Figure E1.

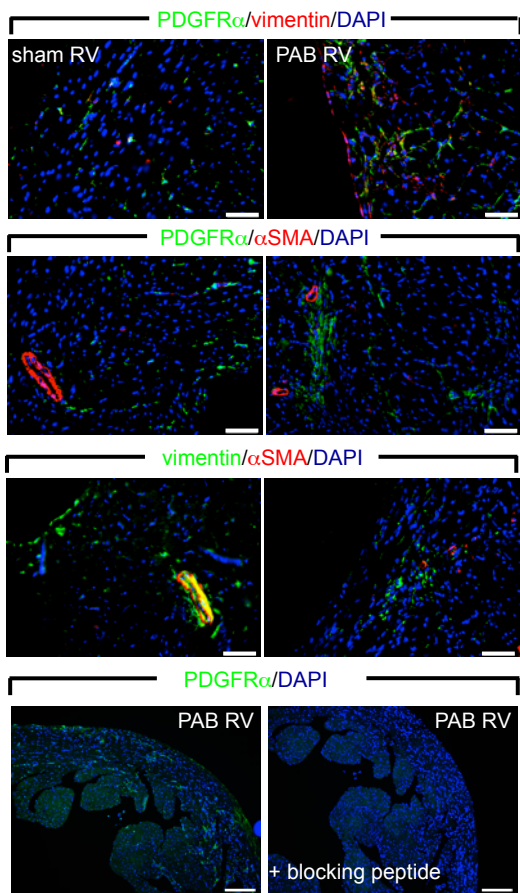

Figure E2.

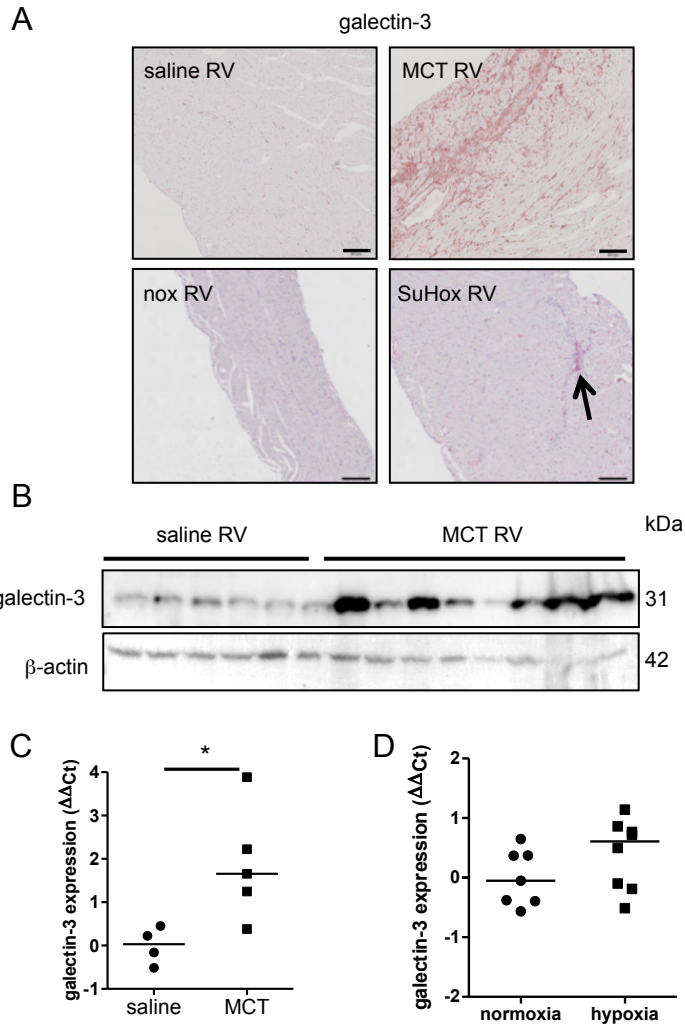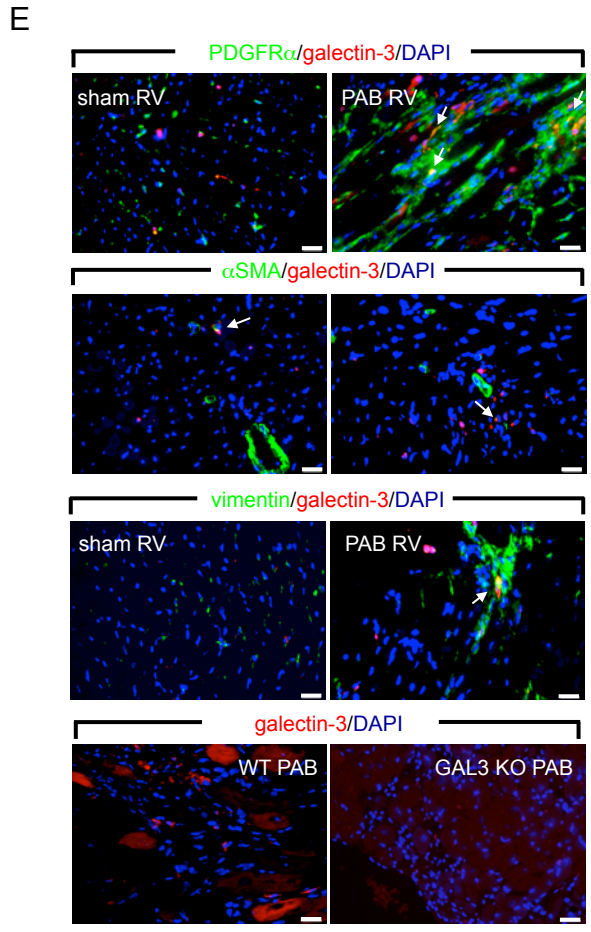



Figure E3.

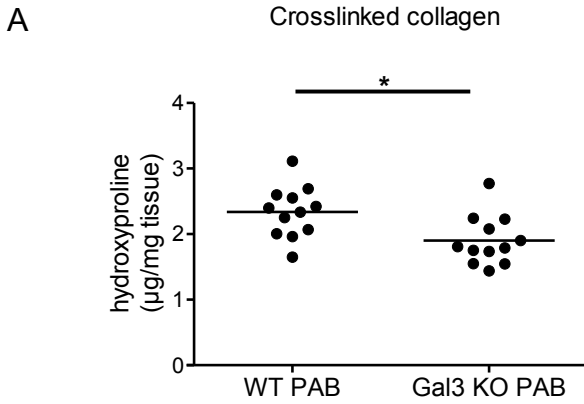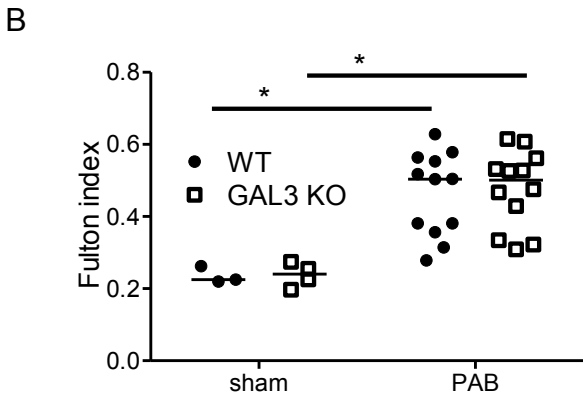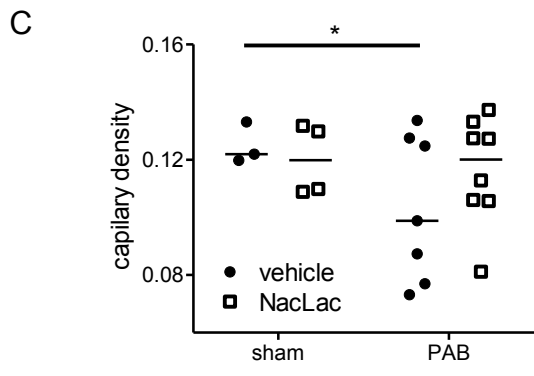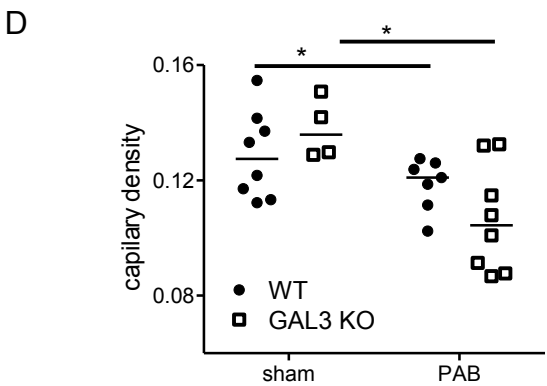

Figure E4.

A

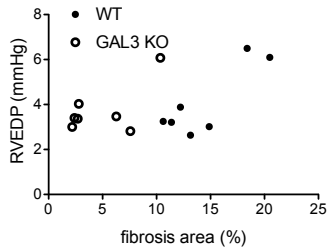

|                         | WT     | GAL3 KO | pooled            |
|-------------------------|--------|---------|-------------------|
| Number of XY Pairs      | 7      | 7       | 14                |
| Spearman r              | 0.3929 | 0.3929  | 0.2352            |
| 95% confidence interval | 0.3956 | 0.3956  | -0.3530 to 0.6901 |
| P value (two-tailed)    | ns     | ns      | 0.4183            |

B

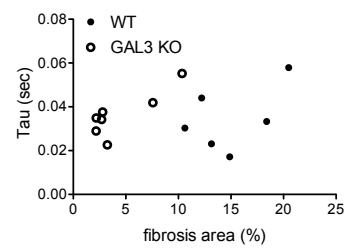

|                         | WT     | GAL3 KO | pooled            |
|-------------------------|--------|---------|-------------------|
| Number of XY Pairs      | 6      | 7       | 13                |
| Spearman r              | 0.3143 | 0.6071  | -0.1374           |
| 95% confidence interval | 0.5639 | 0.1667  | -0.6507 to 0.4621 |
| P value (two-tailed)    | ns     | ns      | 0.6545            |

C

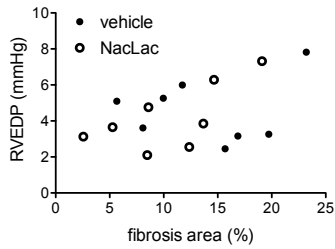

|                         | vehicle  | NaClac | pooled            |
|-------------------------|----------|--------|-------------------|
| Number of XY Pairs      | 8        | 8      | 16                |
| Spearman r              | -0.02381 | 0.6905 | 0.2765            |
| 95% confidence interval | 0.9768   | 0.0694 | -0.2692 to 0.6877 |
| P value (two-tailed)    | ns       | ns     | 0.2999            |

D

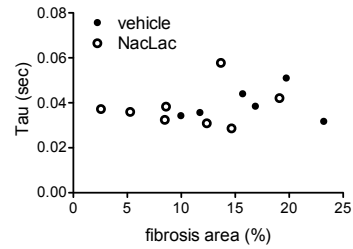

|                         | vehicle | NaClac | pooled            |
|-------------------------|---------|--------|-------------------|
| Number of XY Pairs      | 6       | 8      | 14                |
| Spearman r              | 0.08571 | 0.1190 | 0.2264            |
| 95% confidence interval | 0.9194  | 0.7930 | -0.3612 to 0.6852 |
| P value (two-tailed)    | ns      | ns     | 0.4364            |

E

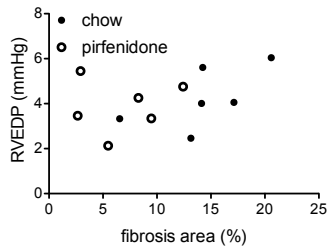

|                         | chow   | pirfenidone | pooled            |
|-------------------------|--------|-------------|-------------------|
| Number of XY Pairs      | 6      | 6           | 12                |
| Spearman r              | 0.8857 | 0.02857     | 0.4266            |
| 95% confidence interval | 0.0333 | 1.0000      | -0.2138 to 0.8105 |
| P value (two-tailed)    | *      | ns          | 0.1667            |

F

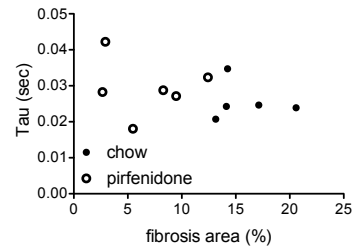

|                         | chow   | pirfenidone | pooled            |
|-------------------------|--------|-------------|-------------------|
| Number of XY Pairs      | 5      | 6           | 11                |
| Spearman r              | 0.3000 | 0.02857     | -0.2636           |
| 95% confidence interval | 0.6833 | 1.0000      | -0.7546 to 0.4166 |
| P value (two-tailed)    | ns     | ns          | 0.4348            |

G

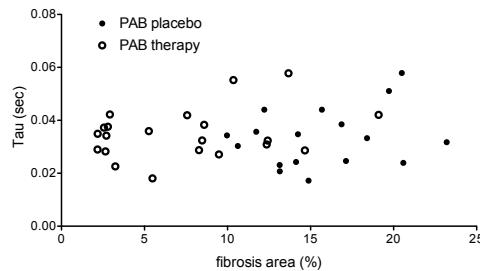

|                         | PAB placebo       | PAB therapy       | PAB               |
|-------------------------|-------------------|-------------------|-------------------|
| Number of XY Pairs      | 17                | 21                | 38                |
| Spearman r              | 0.1373            | 0.1584            | -0.04432          |
| 95% confidence interval | -0.3810 to 0.5900 | -0.3058 to 0.5618 | -0.3675 to 0.2884 |
| P value (two-tailed)    | 0.5991            | 0.4927            | 0.7916            |

# Figure E5.

**A**

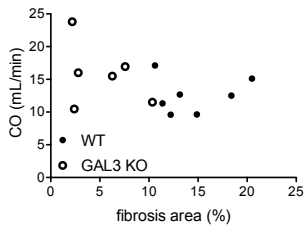

|                         | WT     | GAL3 KO | pooled            |
|-------------------------|--------|---------|-------------------|
| Number of XY Pairs      | 7      | 6       | 13                |
| Spearman r              | 0.0    | -0.2571 | -0.4066           |
| 95% confidence interval | 1.0365 | 0.6583  | -0.7894 to 0.2039 |
| P value (two-tailed)    | ns     | ns      | 0.1680            |

**B**

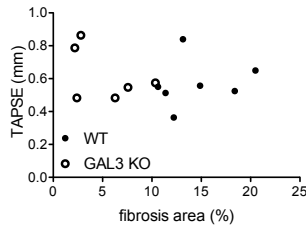

|                         | WT     | GAL3 KO | pooled            |
|-------------------------|--------|---------|-------------------|
| Number of XY Pairs      | 7      | 6       | 13                |
| Spearman r              | 0.4286 | -0.1449 | 0.0               |
| 95% confidence interval | 0.3536 | 0.8028  | -0.5637 to 0.5637 |
| P value (two-tailed)    | ns     | ns      | 1.0000            |

**C**

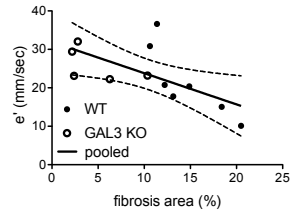

|                         | WT      | GAL3 KO | pooled             |
|-------------------------|---------|---------|--------------------|
| Number of XY Pairs      | 7       | 5       | 12                 |
| Spearman r              | -0.9286 | -0.3000 | -0.7133            |
| 95% confidence interval | 0.0067  | 0.6833  | -0.9165 to -0.2175 |
| P value (two-tailed)    | **      | ns      | 0.0118             |

**D**

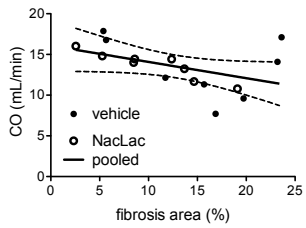

|                         | vehicle | NaCLac  | pooled              |
|-------------------------|---------|---------|---------------------|
| Number of XY Pairs      | 8       | 8       | 16                  |
| Spearman r              | -0.2381 | -0.9286 | -0.5176             |
| 95% confidence interval | 0.5821  | 0.0022  | -0.8120 to -0.01331 |
| P value (two-tailed)    | ns      | **      | 0.0400              |

**E**

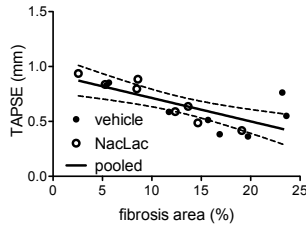

|                         | vehicle | NaCLac  | pooled             |
|-------------------------|---------|---------|--------------------|
| Number of XY Pairs      | 8       | 8       | 16                 |
| Spearman r              | -0.5238 | -0.9048 | -0.7794            |
| 95% confidence interval | 0.1966  | 0.0046  | -0.9222 to -0.4495 |
| P value (two-tailed)    | ns      | **      | 0.0004             |

**F**

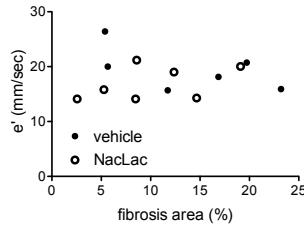

|                         | vehicle | NaCLac | pooled            |
|-------------------------|---------|--------|-------------------|
| Number of XY Pairs      | 6       | 7      | 13                |
| Spearman r              | -0.4286 | 0.5406 | 0.2091            |
| 95% confidence interval | 0.4194  | 0.2357 | -0.4020 to 0.6913 |
| P value (two-tailed)    | ns      | ns     | 0.4930            |

**G**

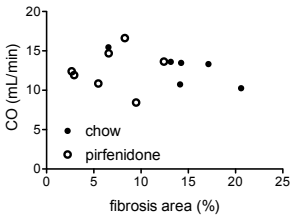

|                         | chow    | pirfenidone | pooled            |
|-------------------------|---------|-------------|-------------------|
| Number of XY Pairs      | 6       | 7           | 13                |
| Spearman r              | -0.8286 | 0.1429      | -0.1758           |
| 95% confidence interval | 0.0583  | 0.7825      | -0.6729 to 0.4306 |
| P value (two-tailed)    | ns      | ns          | 0.5656            |

**H**

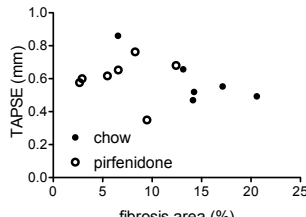

|                         | chow    | pirfenidone | pooled            |
|-------------------------|---------|-------------|-------------------|
| Number of XY Pairs      | 6       | 7           | 13                |
| Spearman r              | -0.6000 | 0.3929      | -0.4176           |
| 95% confidence interval | 0.2417  | 0.3956      | -0.7943 to 0.1911 |
| P value (two-tailed)    | ns      | ns          | 0.1557            |

**I**

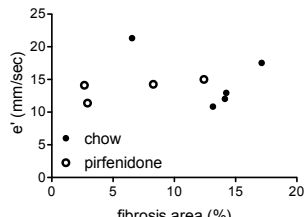

|                         | chow   | pirfenidone | pooled  |
|-------------------------|--------|-------------|---------|
| Number of XY Pairs      | 5      | 4           | 9       |
| Spearman r              | 0.0    | 0.8000      | 0.01667 |
| 95% confidence interval | 1.0500 | 0.3333      | 0.9816  |
| P value (two-tailed)    | ns     | ns          | ns      |

**J**

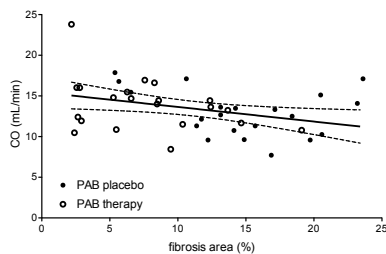

|                         | PAB placebo       | PAB therapy       | PAB                 |
|-------------------------|-------------------|-------------------|---------------------|
| Number of XY Pairs      | 21                | 21                | 42                  |
| Spearman r              | -0.2528           | -0.3584           | -0.3668             |
| 95% confidence interval | -0.6256 to 0.2139 | -0.6915 to 0.1003 | -0.6094 to -0.06143 |
| P value (two-tailed)    | 0.2688            | 0.1106            | 0.0169              |

**K**

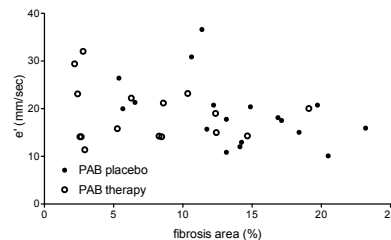

|                         | PAB placebo        | PAB therapy       | PAB                |
|-------------------------|--------------------|-------------------|--------------------|
| Number of XY Pairs      | 18                 | 16                | 34                 |
| Spearman r              | -0.5555            | -0.07965          | -0.2705            |
| 95% confidence interval | -0.8169 to -0.1048 | -0.5646 to 0.4462 | -0.5649 to 0.08487 |
| P value (two-tailed)    | 0.0167             | 0.7694            | 0.1217             |

Figure E6.

A

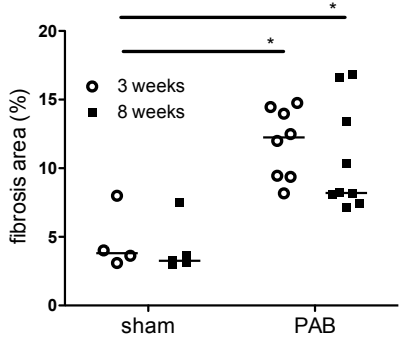

B

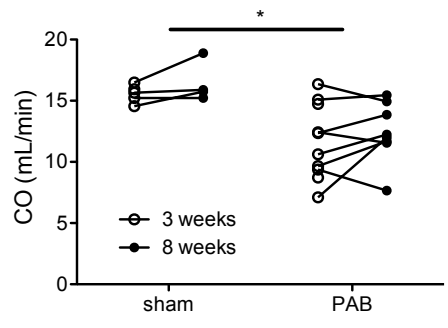

C

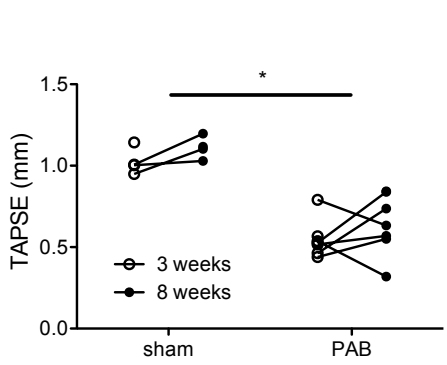

D

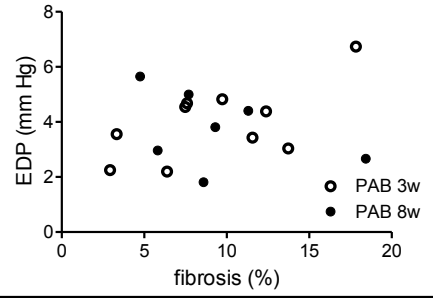

|                         | PAB 3w | PAB 8w  | pooled            |
|-------------------------|--------|---------|-------------------|
| Number of XY Pairs      | 10     | 7       | 17                |
| Spearman r              | 0.4545 | -0.4643 | 0.1201            |
| 95% confidence interval | 0.1912 | 0.3024  | -0.3959 to 0.5784 |
| P value (two-tailed)    | ns     | ns      | 0.6461            |

E

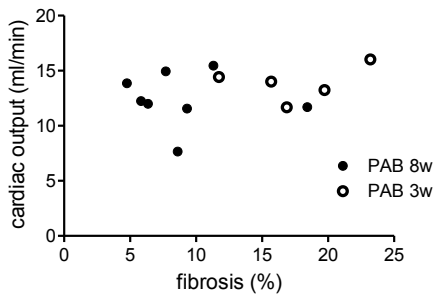

|                         | PAB 3w | PAB 8w  | pooled            |
|-------------------------|--------|---------|-------------------|
| Number of XY Pairs      | 5      | 8       | 13                |
| Spearman r              | 0.1000 | -0.2143 | 0.1703            |
| 95% confidence interval | 0.9500 | 0.6191  | -0.4352 to 0.6697 |
| P value (two-tailed)    | ns     | ns      | 0.5780            |

F

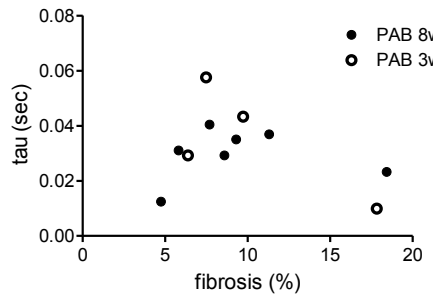

|                         | PAB 3w  | PAB 8w | pooled            |
|-------------------------|---------|--------|-------------------|
| Number of XY Pairs      | 4       | 7      | 11                |
| Spearman r              | -0.4000 | 0.1786 | -0.09091          |
| 95% confidence interval | 0.7500  | 0.7131 | -0.6667 to 0.5528 |
| P value (two-tailed)    | ns      | ns     | 0.7964            |

G

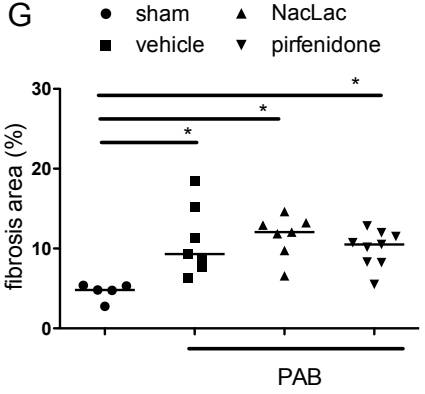

H

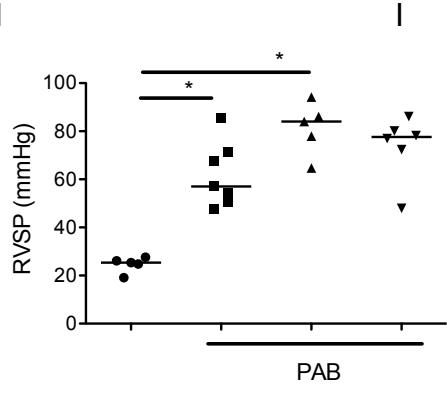

I

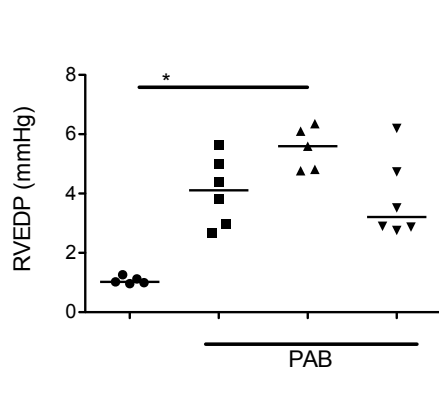

Figure E7.

A

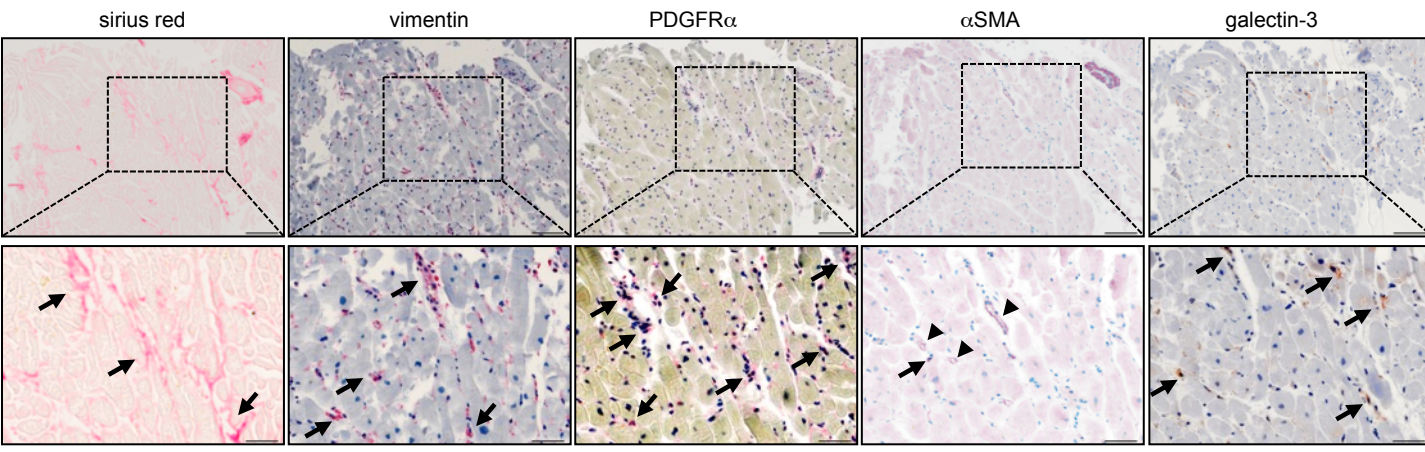

B

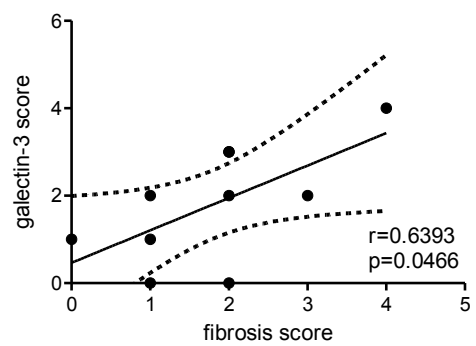

Supplement: rccm.201809-1737OC_crnkovic_data_supplement.pdf [file rccm.201809-1737OC_crnkovic_data_supplement.pdf]
